# Supplementary material
Source: Springer Nature journal article supplement (https://www.springermedizin.de/resource/supplementary/12943_2011_1002_MOESM7_ESM.pdf/9552064)

**A**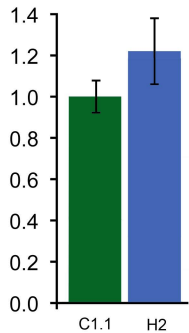**B**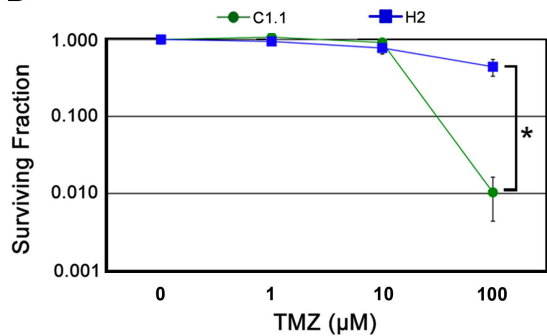**C****Colony Forming Efficiency**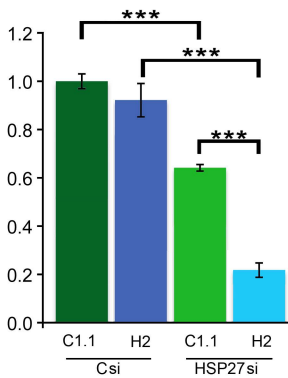**D**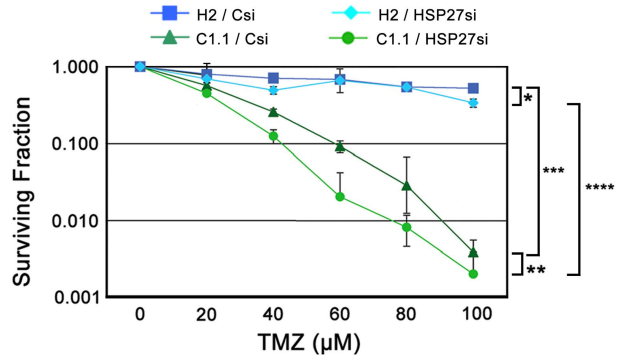

Supplement: MOESM7 [file 9552064]
